# Supplementary material
Source: ML conference proceedings conference paper supplement (https://openreview.net/forum?id=C0zw2ERKiQ)
Supplement: supplementary_material [file attachment]

---

# Rebuttal for “ Revisiting the Evaluation of Image Synthesis with GANs ”

---

Anonymous Author(s)

Affiliation

Address

email

1 **To Reviewer cWrw**

2 **Q1: Include state-of-the-art generative models like diffusion models.**

3 **Reply:** Thanks. Following your valuable suggestion, we further include more state-of-the-art generative models on the ImageNet dataset for synthesis evaluation, namely GigaGAN (CVPR’2023) [7], MDT (ICCV’2023) [4], and DG-Diffusion (ICML’2023) [8]. Specifically, we either gather their official models for inference or download the pre-generated images released by the authors for evaluation. Similarly, 50K generated images and the entire training set (*i.e.*, 1.28M images) are used as the synthesized and real distributions, respectively. All details are consistent with the experiments conducted in our main paper. Tab. 1 presents the quantitative comparison results. Akin to the results in our main paper, our evaluation system provides consistent ranks with FID and human visual evaluation, demonstrating the reliability of our metric. These results will be added in the next version of our paper.

Table 1: **Quantitative comparison results of Centered Kernel Alignment (CKA<sub>↑</sub>) on ImageNet dataset.** † scores are quoted from the original paper and others are tested three times.

| Model            | FID <sup>†</sup> | ConvNeXt | RepVGG | SWAV  | ViT   | MoCo-ViT | CLIP-ViT | Overall | User study |
|------------------|------------------|----------|--------|-------|-------|----------|----------|---------|------------|
| GigaGAN [7]      | 3.45             | 68.01    | 79.93  | 90.15 | 98.34 | 82.40    | 96.52    | 85.89   | 65%        |
| DG-Diffusion [8] | 3.18             | 68.22    | 80.06  | 90.56 | 98.46 | 82.51    | 96.88    | 86.12   | 66%        |
| MDT [4]          | 1.79             | 69.64    | 81.68  | 91.78 | 99.43 | 83.43    | 98.19    | 87.36   | 69%        |

13 **Q2: Provide the evaluation on more MLP-based models like mlp-mixer.**

14 **Reply:** Thanks. As suggested, two MLP-based models are leveraged as the feature extractor for synthesis evaluation, namely gMLP [12] and MLP-mixer [20]. Following the experimental settings in our main paper, we identify the reliability and robustness of these MLP-based models via 1) visualizing the highlighted regions that contribute most significantly to the measurement results, and 2) attacking the feature extractor with histogram matching attack. Fig. 1 and Tab. 2 respectively present the qualitative and quantitative results. On one hand, the heatmap visualization results indicate that both gMLP and mixer-MLP capture limited semantics. Considering that more visual semantics should be considered for a more comprehensive evaluation, gMLP and MLP-mixer might not be adequate for synthesis comparison. On the other hand, the quantitative results demonstrate that their FD scores could be altered by the histogram matching attack, without actually improving the synthesis quality. That is, gMLP and MLP-mixer are susceptible to the histogram attack. Together with the finding that the FD scores of ResMLP could be manipulated without any improvement to the generative models in Tab.2 of our main paper, we do not integrate MLP-based feature extractors into our measurement system. These results will be added in the next version of our paper.

28 **Q3: 100 Human Judgment may not enough to fully capture the complexities of evaluating generative models objectively.**

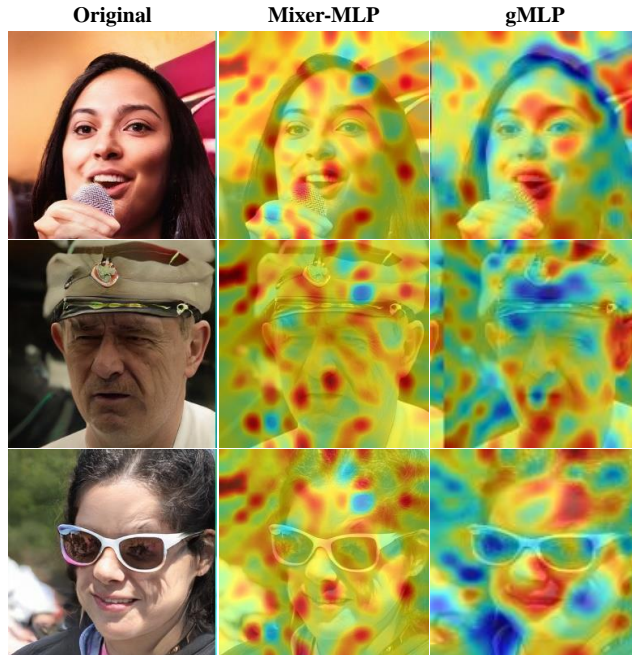

Figure 1: Heatmaps from MLP-based extractors, namely Mixer-MLP [20] and gMLP [12].

Table 2: Quantitative comparison results of MLP-based extractors’ Fréchet Distance ( $FD_{\downarrow}$ ) on the ImageNet dataset.  $\dagger$  scores are quoted from the original paper and others are tested three times.

| Extractor | Random           | Chosen $_T$                 |
|-----------|------------------|-----------------------------|
| gMLP      | $2.93 \pm 0.004$ | $2.89 \pm 0.004 \downarrow$ |
| mixer-MLP | $5.51 \pm 0.01$  | $5.35 \pm 0.01 \downarrow$  |

30 **Reply:** Thanks. We agree that involving thousands of persons for human visual evaluation can  
 31 provide more consistent and reliable results. However, this is too expensive for us as including  
 32 thousands of participants requires massive human and time resources. Therefore, two strategies  
 33 of human perceptual judgment are designed for different investigations in our main experiments,  
 34 namely benchmarking the synthesis quality of one specific generative model and comparing two  
 35 paired models. In particular, 100 participants are asked to vote the synthesis quality and their final  
 36 scores are averaged to avoid overly subjective individual outcomes. Moreover, in order to ensure that  
 37 our human evaluation is reliable and consistent, we repeat the same images several times (*i.e.*, 4)  
 38 randomly for human visual comparison. In this way, if one user vote photorealistic and unrealistic  
 39 two times each for the same images, the results would be considered as indistinguishable. This  
 40 operation further filters overly subjective individual judgment and ensure the rationality of our user  
 41 study. Additionally, we notice that common choice for human evaluation in the community is to  
 42 include about 50 participants for perceptual comparison [18, 23, 14, 22, 16, 11, 10]. For instance,  
 43 [23], [18] and [10] asked 50 workers to pick the unrealistic images, ProjectedGAN [16] conducted  
 44 a human preference study with only 28 participants, and the most recent work [14] included only  
 45 15 graders to compare the synthesis quality. By contrast, 100 persons are involved in our human  
 46 judgment, thus we believe that our perceptual comparison results are reliable. Furthermore, we view  
 47 large-scale human evaluation as our future work to perform more extensive investigations.

48 Hope that the above discussions could address your concerns, please let us know if you have any  
 49 further questions. Thanks for your effort and constructive suggestions again.

50 **To Reviewer Z9sB**

51 **Q1: Only the mean values of metrics are reported, no stds.**

52 **Reply:** Thanks. As suggested, we add the std values of our experiments to better illustrate the  
 53 numerical fluctuation of various extractors towards the histogram attack. 3 presents the quantitative

Table 3: **Quantitative comparison results of Fréchet Distance (FD<sub>↓</sub>) on FFHQ dataset.** “Random, Chosen<sub>r</sub>” respectively represent the synthesized distribution of randomly generated and matching the class prediction of Inception-V3. Moreover, “<sub>v</sub>” and “<sub>v</sub>” respectively denote the architecture of ResNet and ViT. (↓) indicates the results are hacked by the histogram matching mechanism. Notably, the values across different rows are not comparable and the results are tested three times.

| Model               | Inception  | ConvNeXt   | SWAV       | MoCo <sub>r</sub> | RepVGG      | CLIP <sub>r</sub> | Swin         | ViT        | DeiT         | CLIP <sub>v</sub> | MoCo <sub>v</sub> | ResMLP      |
|---------------------|------------|------------|------------|-------------------|-------------|-------------------|--------------|------------|--------------|-------------------|-------------------|-------------|
| Random              | 2.81±0.01  | 78.03±0.10 | 0.13±0.002 | 0.24±0.003        | 129.61±0.41 | 10.34±0.06        | 142.87±0.12  | 15.11±0.09 | 437.80±0.14  | 1.06±0.01         | 7.32±0.03         | 99.11±0.06  |
| Chosen <sub>r</sub> | 2.65±0.01↓ | 78.19±0.11 | 0.13±0.002 | 0.24±0.003        | 129.67±0.39 | 10.36±0.08        | 140.01±0.12↓ | 15.11±0.10 | 430.81±0.16↓ | 1.06±0.01         | 7.40±0.03         | 95.36±0.06↓ |

54 results. We could tell that the FD scores of extractors that are vulnerable to the attack can be improved  
 55 by matching the histogram, and the improvement of FD scores is greater than stds. For instance,  
 56 the improvement of FD scores from the Inception model is 0.16 and the computation std is only  
 57 0.01, there is an order of magnitude difference between them. Moreover, the improvement of FD  
 58 scores from the Swin-Transformer model is 2.86 and the computation std is only 0.12. That is, the  
 59 improvement is actually caused by the histogram attack rather than the variance of attempts. Note  
 60 that the generator is unchanged but the FD scores are improved by the attack, which is unacceptable  
 61 for synthesis evaluation. Accordingly, extractors that are vulnerable to the histogram matching attack  
 62 are not reliable for evaluation.

63 **Q2: The authors provide many tables with the results but it is not trivial to parse them.**  
 64 **Specifically, checking whether this or that metric correlates with the human evaluation should**  
 65 **be done manually. It would be great if this could be somehow quantified or visualized (e.g.,**  
 66 **FID/other metrics as functions of the user score, 2D plots).**

67 **Reply:** Thanks. Following your valuable suggestion, we visualize the correlation between different  
 68 metrics and the human evaluation results. Specifically, we plot the correlation of the averaged  
 69 ranks of various models given by human judgment, CKA, and FID. Fig. 2 and Fig. 3 respectively  
 70 present the visualization results of the ImageNet, FFHQ, and LSUN-Church datasets. Obviously, the  
 71 averaged ranks given by CKA are more consistent with that of the human evaluation, demonstrating  
 72 the accuracy of CKA. Moreover, we plot the comparison between the stds and the improvements  
 73 obtained by the histogram attack for better illustration. Fig. 4 presents the results. Similarly, we  
 74 could observe that the improvement is actually caused by the histogram attack rather than the variance  
 75 of attempts.

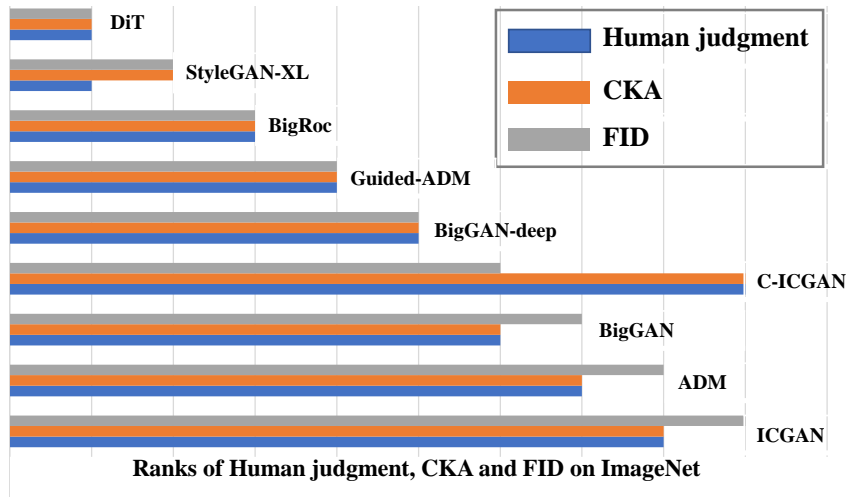

Figure 2: **The correlation of the averaged ranks of various models on ImageNet given by human judgment, CKA, and FID.**

76 **Q3: May be it is more fair to emphasize other advantages of CKA (such as the sample efficiency)**  
 77 **rather than consistency and reliability.**

78 **Reply:** Thanks. On one hand, our results demonstrate that CKA provides a consistent ranking with  
 79 the FID scores in most cases, demonstrating that CKA can deliver the similarity between different  
 80 data distributions. On the other hand, CKA agrees with human visual judgment whereas FID fails in

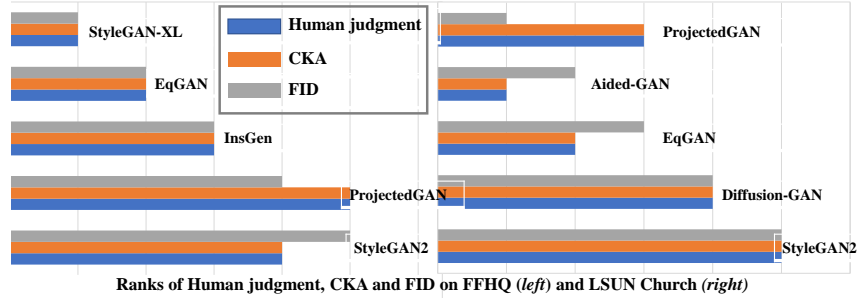

Figure 3: **The correlation of the averaged ranks of various models on FFHQ and LSUN-Church given by human judgment, CKA, and FID.**

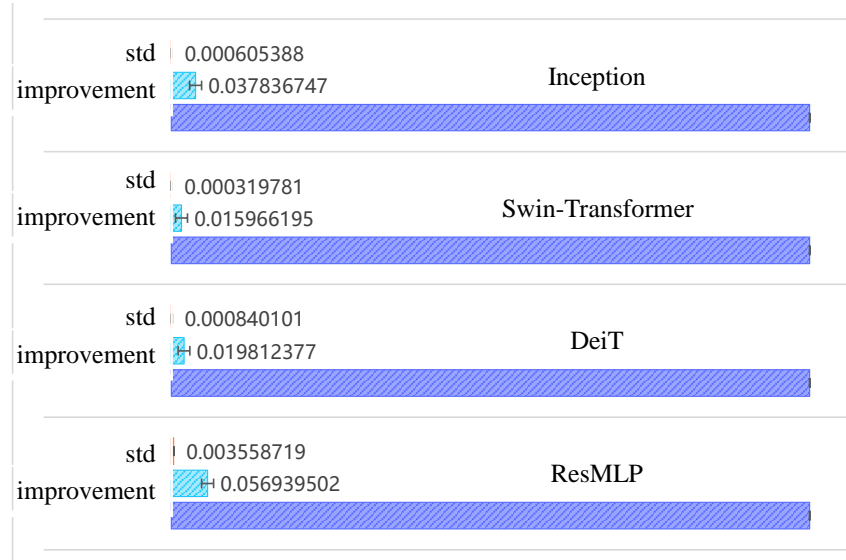

Figure 4: **The quantitative comparison between the stds and the improvements obtained by the histogram attack.**

81 some circumstances. That is, CKA can measure the synthesis performance more reliable than FID.  
 82 Additionally, CKA shows better sample efficiency than both FID and KID. Thus we integrate CKA  
 83 as the distributional distance to evaluate the synthesis performance in our system. Together with  
 84 several robust feature extractors, our new measurement system is more consistent and reliable than  
 85 exiting alternatives. In the main paper, we emphasize the reliability and consistency of our entire  
 86 system rather than only the distributional distance (*i.e.*, CKA) as both the extractors and distances are  
 87 important. We will proofread our presentation and emphasize the advantages of our overall system  
 88 following your valuable suggestions.

89 **Q4: Include at least some evaluation/comparison/comment with this KID (both in terms of**  
 90 **correlation with human evaluation and sample efficiency).**

91 **Reply:** Thanks. Following your valuable suggestion, we further involve Kernel Inception Distance  
 92 (KID) [1], precision, and recall [15] into our comparison. Note that the original KID employs  
 93 Inception-V3 as the feature extractor, and there is a large “perceptual null space” in Inception-V3.  
 94 Therefore, we first investigate whether KID scores can be altered by attacking the feature extractor  
 95 with the histogram matching mechanism. The experimental details are consistent with computing  
 96 Fréchet Distance ( $FD_{\downarrow}$ ) in Tab.2 of the main paper. Tab. 6 presents the quantitative results. Still,  
 97 some extractors, such as Inception, Swin-Transformer, and ResMLP, are susceptible to the histogram  
 98 matching attack. For instance, the KID score of Swin-Transformer is improved by 5.31% when the  
 99 chosen set is used. These observations agree with our findings in our main paper, suggesting that  
 100 certain extractors can be hacked when KID is employed as the distributional distance. Then, we  
 101 investigate the sample efficiency of KID, Precision, and Recall to probe the impacts of the amount

102 of generated samples. Fig. 5 presents the curves of KID, Precision, and Recall scores computed  
 103 under different data regimes. Similarly, we could observe that the KID scores can be improved by  
 104 synthesizing more images. Interestingly, the recall scores decrease as the generated sample size  
 105 increases whereas the precision is stable. This is caused by the definition of recall: recall measures  
 106 the proportion of the real distribution that is covered by the synthesized distribution. In practical  
 107 computation, the denominator increases as the synthesized samples increases, while the numerator  
 108 (*i.e.*, images from the real distribution) remain unchanged. In this way, the recall scores decrease  
 109 as the generated sample size increases and vice versa. By contrast, CKA scores are stable under  
 110 different data regimes, (please see Fig. 2 in the main paper). Moreover, CKA can provide reliable  
 111 synthesis evaluation that agrees with human visual judgment. Accordingly, CKA is a proper choice  
 112 for building a consistent and reliable measurement system.

113 **Q5: The authors should better explain CKA metric in the main text.**

114 **Reply:** Thanks. Following your valuable suggestion, we add more details of the CKA metric as  
 115 follows:

116 **Centered Kernel Alignment (CKA)** as a widely used similarity index for quantifying neural network  
 117 representations [2, 9, 3], could also serve as a metric of similarity between two given distributions. To  
 118 be specific, CKA is normalized from Hilbert-Schmidt Independence Criterion (HSIC) [5] to ensure  
 119 invariant to isotropic scaling and is calculated by

$$\text{CKA}(X, Y) = \frac{\text{HSIC}(x, y)}{\sqrt{\text{HSIC}(x, x)\text{HSIC}(y, y)}}. \quad (1)$$

120 Here, HSIC determines whether two distributions are independent. Formally, let  $K_{ij} = k(x_i, x_j)$   
 121 and  $L_{ij} = l(y_i, y_j)$ , where  $k$  and  $l$  are two kernels. HSIC is defined as

$$\text{HSIC}(K, L) = \frac{1}{(n-1)^2} \text{Tr}(KHLH), \quad (2)$$

122 where  $H$  denotes the centering matrix (*i.e.*,  $H_n = I_n - \frac{1}{n}\mathbf{1}\mathbf{1}^T$ ). For kernel selections of  $k$  and  $l$ , we  
 123 find that different kernels (RBF, polynomial, and linear) give similar results and rankings, and the RBF  
 124 kernel contributes to the distinguishability of quantitative results. Therefore, RBF kernel is used for  
 125 all experiments, and the bandwidth is set as a fraction of the median distance between examples [9].  
 126 These metrics are compared in a consistent setting for fair comparison, more implementation details  
 127 are given in *Supplementary Material*.

128 **Q6: Provide a more explanatory discussion of what is CKA (beside the formulas) and some  
 129 intuition what it measure and why it is a good metric?**

130 **Reply:** Thanks. As a widely used similarity index for measuring the correspondence between  
 131 representations in neural networks, CKA has been identified to have several advantages: 1) CKA is  
 132 invariant to orthogonal transformation and isotropic scaling, making it stable under various image  
 133 transformations; 2) CKA can capture the non-linear correspondence between representations due  
 134 to its kernel mapping; and 3) CKA can determine the correspondence across different features and  
 135 with different widths, whereas previous metrics fail [9]. Additionally, through extensive experiments,  
 136 we demonstrate that CKA can provide an accurate evaluation for synthesis comparison and is sample-  
 137 efficient. Accordingly, CKA is a good metric for delivering the distributional discrepancy.

138 **Q7: What is the "null space" of this metric?**

139 **Reply:** Thanks. In fact, it is the feature extractor that might have a "perceptual null space". For  
 140 instance, the Inception model has been identified to have a large "perceptual null space", leading  
 141 it vulnerable to the histogram matching attack. Moreover, CKA measures the similarity between  
 142 different distributions, and  $\text{CKA}(X, Y) = 1$  if and only if the two sets coincide.

143 **Q8: What is the computational complexity of CKA compared to FID? How it scales with the  
 144 feature dimension and sample size?**

145 **Reply:** Thanks. Assume  $N$  samples from the evaluated distributions are used for calculating CKA,  
 146 the main computational complexity of CKA comes from: 1) centering the kernel matrix with the  
 147 pre-defined centering matrix with the complexity of  $\mathcal{O}(N^2)$ ; and 2) computing HSIC scores with

148 the complexity of  $\mathcal{O}(N^3)$ . Therefore, the overall computational complexity of CKA is  $\mathcal{O}(N^3)$ . By  
 149 contrast, the computational complexity of FID mainly comes from calculating the mean and variance  
 150 of the sample features ( $N \times d$ , where  $d$  denotes the feature dimension). The computational complexity  
 151 is  $\mathcal{O}(N \times d)^3$ . The computational complexity of both CKA and FID increases linearly with the cubic  
 152 power of sample size. Moreover, as suggested, we provide the clock time of FID and CKA in the  
 153 following table. Concretely, we use the full FFHQ dataset (70K images) as the reference distribution  
 154 and generate 50K images for evaluation, the clock time is tested on a single 3090 24G GPU. We  
 could tell that CKA takes shorter time than FID when the same amount of samples are calculated.

| Extractor | Inception | ViT      |
|-----------|-----------|----------|
| FID       | 3426 (s)  | 3630 (s) |
| CKA       | 3225 (s)  | 3328 (s) |

155

156 **Q9: What is the theoretical sample complexity of CKA? Are there any known results here?**

157 **Reply:** Thanks. To the best of our knowledge, there are no known results of the theoretical sample  
 158 complexity of CKA. CKA measures the distributional discrepancies between different distributions  
 159 with a considerable samples from each distribution. Accordingly, involving sufficient samples for  
 160 evaluation ensures more accurate results in practice. However, through evaluating the CKA scores  
 161 under various data regimes, we observe that CKA shows satisfactory sample-efficiency and stability  
 162 under different number of samples. Therefore, we can synthesize subsets with fixed number of images  
 163 (e.g., 50 K) for evaluation. By contrast, the FID and KID scores could be improved by producing  
 164 more samples, which is unacceptable for a reliable evaluation.

165 **Q10: Is centered kernel alignment somehow related to the kernel maximum mean discrepancy (KID/MMD)?**

166 **Reply:** Thanks. Centered Kernel Alignment (CKA) is normalized from Hilbert-Schmidt  
 167 Independence Criterion (HSIC) [5] to ensure it is invariant to isotropic scaling and is formally  
 168 defined by  
 169

$$\text{CKA}(X, Y) = \frac{\text{HSIC}(x, y)}{\sqrt{\text{HSIC}(x, x)\text{HSIC}(y, y)}}. \quad (3)$$

170 HSIC is equivalent to maximum mean discrepancy (MMD) between the joint distribution and the  
 171 product of the marginal distributions, and HSIC with a specific kernel family is equivalent to distance  
 172 covariance [17]. HSIC determines whether two distributions are independent, and HSIC = 0 implies  
 173 independence. However, HSIC is not invariant to isotropic scaling, making it sensitive to isotropic  
 174 transformation of images when used for synthesis evaluation.

175 Hope that the above discussions could address your concerns, please let us know if you have any  
 176 further questions. Thanks for your effort and constructive suggestions again.

177 **To Reviewer 95Dj**

178 **Q1: There are no ablation studies to separately prove the effectiveness of six extractors and CKA.**

179 **Reply:** Thanks. In this work, we seek to develop a new measurement system that could provide  
 180 reliable and consistent synthesis comparisons. In particular, two key components are crucial  
 181 for the measurement system, i.e., the feature extractor that defines representation space and the  
 182 distributional distance that deliver similarities. Accordingly, we make in-depth analyses on the  
 183 reliability and robustness of various feature extractors and different distributional distances. For the  
 184 feature extractors, we gather multiple models that are pre-trained with different objectives (fully-  
 185 supervised/self-supervised) and various architectures (CNN/ViT/MLP). Notably, these models are  
 186 chosen for a systematic investigation to comprehensively understand the intrinsic properties of various  
 187 extractors, rather than based on existing findings. Then, we testify their performance on 1) how many  
 188 semantic features they can capture for evaluation, 2) how robust they are when being attacked by the  
 189 histogram matching mechanism, and 3) how distinct the representation space they can define. These  
 190 investigations provide several new findings to the community, including 1) one specific extractor  
 191 can only capture limited semantics and provide one-side results, 2) extractors that are vulnerable  
 192

Table 4: **Quantitative comparison results of Fréchet Distance ( $FD_{\downarrow}$ ) on ImageNet dataset.** “Random, Chosen<sub>r</sub>” respectively represent the synthesized distribution of randomly generated and matching the class prediction of Inception-V3. Moreover, “<sub>r</sub>” and “<sub>v</sub>” respectively denote the architecture of ResNet and ViT. ( $\downarrow$ ) indicates the results are hacked by the histogram matching mechanism. Notably, the values across different rows are not comparable and the results are tested **three times**.

| Model               | Inception               | ConvNeXt   | SWAV       | MoCo <sub>r</sub> | RepVGG     | CLIP <sub>r</sub> | Swin                     | ViT        | DeiT                     | CLIP <sub>v</sub> | MoCo <sub>v</sub> | ResMLP                   |
|---------------------|-------------------------|------------|------------|-------------------|------------|-------------------|--------------------------|------------|--------------------------|-------------------|-------------------|--------------------------|
| Random              | 34.29±0.09              | 78.02±0.16 | 0.13±0.003 | 0.32±0.002        | 54.98±0.22 | 27.64±0.15        | 323.12±0.88              | 50.97±0.20 | 621.98±1.02              | 5.46±0.09         | 50.01±0.21        | 145.32±1.02              |
| Chosen <sub>r</sub> | 33.05±0.08 $\downarrow$ | 78.10±0.14 | 0.13±0.002 | 0.32±0.002        | 54.30±0.24 | 27.66±0.17        | 301.91±0.92 $\downarrow$ | 50.96±0.18 | 597.32±1.11 $\downarrow$ | 5.46±0.07         | 50.00±0.19        | 133.06±1.09 $\downarrow$ |

193 to the histogram matching attack are not reliable, and 3) different feature extractors might define  
 194 similar representation spaces. For the distributional distances, we investigate the numerical stability  
 195 of different distances across various representation spaces and the sample efficiency of different  
 196 distances. Through extensive comparisons, we find that Centered Kernel Alignment (CKA) provides a  
 197 better comparison across various extractors and hierarchical layers with its bounded score. Moreover,  
 198 CKA is more sample-efficiency and exhibits better agreement with human visual judgment. Together  
 199 with these findings, we build a new measurement system that can accurately reflect the synthesis  
 200 performance. Following this line, the effectiveness of each feature extractors and CKA is identified  
 201 in our main experiments. In particular, Fig. 1 of the main paper indicates that the chosen six feature  
 202 extractors can incorporate more visual semantics for evaluation in a complementary manner. And Tab.  
 203 2 of the main paper demonstrates that each of the chosen extractors is robust towards the histogram  
 204 attack. Furthermore, in Tab.4 of the main paper and Tab.4, 5, 6, 7, 8 of the supplementary material,  
 205 we provide qualitative and quantitative results of each extractor from various semantic levels. These  
 206 results also demonstrate the reliability of each extractor when used for synthesis evaluation. In  
 207 addition to evaluating the robustness of these extractors on the FFHQ dataset, we further perform the  
 208 same experiment on the ImageNet dataset. Tab. 4 presents the quantitative results. We can tell from  
 209 these results that the chosen feature extractors are robust to the attack, further demonstrating their  
 210 reliability.

211 **Q2: It is important to research how to improve the speed of evaluation without affecting the**  
 212 **evaluation accuracy.**

213 **Reply:** Thanks. We agree. Both evaluation speed and accuracy are very important in practice. This  
 214 work focuses on developing a measurement system that could reliably and consistently reflect the  
 215 synthesis performance. Based on the findings that one certain feature extractor might capture only  
 216 limited semantics for evaluation, we integrate multiple extractors to alleviate this. Therefore, the  
 217 evaluation time is relatively longer than using one extractor for evaluation. However, the inference  
 218 time of these feature extractors is much shorter than the inference time of diffusion models. For  
 219 instance, the evaluation time of our measurement system on 50K images is about 5 hours on a single  
 220 3090 24G GPU, but it takes about several days to generate 50K images with diffusion models (about  
 221 4 days for MDT and 2.5 days for DG-Diffusion). Consequently, improving both the speed of our  
 222 evaluation and the inference speed of diffusion models is also important. In the future, we plan to  
 223 integrate various accelerate techniques to improve our evaluation speed without compromising the  
 224 evaluation accuracy, such as optimizing the model architecture, model pruning and distillation, *etc.*

225 **Q3: The layers of Section 2.3, 3.1 and 3.2 are not prominent and the organization of them is not**  
 226 **clear. Specifically, the summary sentences are not emphasized and paragraph are not strictly**  
 227 **parallel.**

228 **Reply:** Thanks. Our presentation is organized for following reasons: In Section 2.3, we present the  
 229 details of generative models, evaluated datasets, and analysis approaches (including our visualization  
 230 tool, histogram matching attack, and human evaluation). They are independent of each other, thus  
 231 we discuss them in parallel in the main paper. In Section 3.1, we investigate the feature extractors  
 232 by first identifying their attention on visual semantics, followed by investigating their robustness to  
 233 the histogram matching attack. Finally, we filter extractors that define similar representation spaces.  
 234 These studies are gradually deepening, thus they are organized in a progressive manner. In Section  
 235 3.2, we first study the numerical scales of CKA and FID across various extractors and hierarchical  
 236 layers of one certain extractor. After that, we investigate the sample efficiency of CKA and KID. In

237 the last paragraph of Section 3.2, we summarize our findings about the feature extractors and the  
238 distributional distances. Moreover, the summary sentences of each paragraph provide our primary  
239 findings of this paragraph. Following your valuable suggestions, we will carefully proofread and  
240 revise the corresponding presentation to make our paper more logical.

241 Hope that the above discussions could address your concerns, please let us know if you have any  
242 further questions. Thanks for your effort and constructive suggestions again.

243 **To Reviewer y8MJ**

244 **Q1: The novelty is limited. CKA is a well-known metric for evaluating the similarity between**  
245 **distributions.**

246 **Reply:** Thanks. In this work, we seek to develop a new measurement system that could provide  
247 reliable and consistent synthesis comparisons. In particular, two key components are crucial  
248 for the measurement system, *i.e.*, the feature extractor that defines representation space and the  
249 distributional distance that deliver similarities. Accordingly, we make in-depth analyses on the  
250 reliability and robustness of various feature extractors and different distributional distances. For  
251 the feature extractors, we gather multiple models that are pre-trained with different objectives  
252 (fully-supervised/self-supervised) and various architectures (CNN/ViT/MLP). Then, we testify their  
253 performance on 1) how many semantic features they can capture for evaluation, 2) how robust  
254 they are when being attacked by the histogram matching mechanism, and 3) how distinct the  
255 representation space they can define. These investigations provide several new findings to the  
256 community, including 1) one specific extractor can only capture limited semantics and provide  
257 one-side results, 2) extractors that are vulnerable to the histogram matching attack are not reliable,  
258 and 3) different feature extractors might define similar representation spaces. For the distributional  
259 distances, we investigate the numerical stability of different distances across various representation  
260 spaces and the sample efficiency of different distances. Through extensive comparisons, we find  
261 that Centered Kernel Alignment (CKA) provides a better comparison across various extractors  
262 and hierarchical layers with its bounded score. Moreover, CKA is more sample-efficiency and  
263 exhibits better agreement with human visual judgment. Together with these findings, we build a  
264 new measurement system that can accurately reflect the synthesis performance. To the best of our  
265 knowledge, this paper is the first work to present these findings about feature extractors and to  
266 incorporate CKA for synthesis measurement in the community. We believe that these findings can  
267 provide potential insights to further works that develop new evaluation protocols.

268 **Q2: Lacks discussion of some state-of-the-art methods, such as stable diffusion and midjourney.**

269 **Reply:** Thanks. Following your valuable suggestion, we further include more state-of-the-  
270 art generative models on the ImageNet dataset for synthesis evaluation, namely GigaGAN  
271 (CVPR'2023) [7], MDT (ICCV'2023) [4], and DG-Diffusion (ICML'2023) [8]. Specifically, we  
272 either gather their official models for inference or download the pre-generated images released by  
273 the authors for evaluation. Similarly, 50K generated images and the entire training set (*i.e.*, 1.28M  
274 images) are used as the synthesized and real distributions, respectively. All details are consistent with  
275 the experiments conducted in our main paper. Tab. 5 presents the quantitative comparison results.  
276 Akin to the results in our main paper, our evaluation system provides consistent ranks with FID and  
277 human visual evaluation, demonstrating the reliability of our metric. Notably, this paper focuses on  
278 evaluating the performance of various generative models trained on single modality (*i.e.*, images).  
279 Therefore, evaluating generative models that are trained on multiple modality synthesis tasks (*e.g.*,  
280 text-to-image generation) is slightly out of our scope. However, multiple modality tasks such as text-  
281 to-image/video have made remarkable progress recently, and evaluating their performance accurately  
282 is a very important and promising topic. Accordingly, we plan to investigate the performance of our  
283 measurement system under multiple modality synthesis tasks in our future work.

284 **Q3: This paper only compares CKA with FID and lacks a comparison with the other metrics.**  
285 **A discussion of these related metrics is needed.**

286 **Reply:** Thanks. Following your valuable suggestion, we further involve Kernel Inception Distance  
287 (KID) [1], precision, and recall [15] into our comparison. Note that the original KID employs  
288 Inception-V3 as the feature extractor, and there is a large "perceptual null space" in Inception-V3.



Table 5: **Quantitative comparison results of Centered Kernel Alignment (CKA<sub>↑</sub>) on ImageNet dataset.** † scores are quoted from the original paper and others are tested three times.

| Model            | FID <sup>†</sup> | ConvNeXt | RepVGG | SWAV  | ViT   | MoCo-ViT | CLIP-ViT | Overall | User study |
|------------------|------------------|----------|--------|-------|-------|----------|----------|---------|------------|
| GigaGAN [7]      | 3.45             | 68.01    | 79.93  | 90.15 | 98.34 | 82.40    | 96.52    | 85.89   | 65%        |
| DG-Diffusion [8] | 3.18             | 68.22    | 80.06  | 90.56 | 98.46 | 82.51    | 96.88    | 86.12   | 66%        |
| MDT [4]          | 1.79             | 69.64    | 81.68  | 91.78 | 99.43 | 83.43    | 98.19    | 87.36   | 69%        |

Table 6: **Quantitative comparison results of Kernel Inception Distance (KID<sub>↓</sub>,  $\times e^{-3}$ ) on FFHQ dataset.** “Random, Chosen<sub>r</sub>” respectively represent the synthesized distribution of randomly generated and matching the class prediction of Inception-V3. Moreover, “<sub>r</sub>” and “<sub>v</sub>” respectively denote the architecture of ResNet and ViT. (↓) indicates the results are hacked by the histogram matching mechanism. Notably, the values across different rows are not comparable and the results are tested three times.

| Model               | Inception  | ConvNeXt   | SWAV      | MoCo <sub>r</sub> | RepVGG     | CLIP <sub>r</sub> | Swin        | ViT        | DeiT       | CLIP <sub>v</sub> | MoCo <sub>v</sub> | ResMLP     |
|---------------------|------------|------------|-----------|-------------------|------------|-------------------|-------------|------------|------------|-------------------|-------------------|------------|
| Random              | 1.88±0.02  | 34.81±0.11 | 9.61±0.06 | 5.31±0.06         | 33.88±0.29 | 2.85±0.05         | 21.64±0.10  | 16.74±0.10 | 18.01±0.19 | 38.06±0.20        | 15.41±0.09        | 4.86±0.02  |
| Chosen <sub>r</sub> | 1.71±0.02↓ | 34.82±0.10 | 9.61±0.06 | 5.31±0.05         | 33.89±0.27 | 2.85±0.05         | 20.49±0.09↓ | 16.74±0.12 | 19.39±0.22 | 38.09±0.19        | 15.40±0.07        | 4.70±0.02↓ |

289 Therefore, we first investigate whether KID scores can be altered by attacking the feature extractor  
 290 with the histogram matching mechanism. The experimental details are consistent with computing  
 291 Fréchet Distance (FD<sub>↓</sub>) in Tab.2 of the main paper. Tab. 6 presents the quantitative results. Still,  
 292 some extractors, such as Inception, Swin-Transformer, and ResMLP, are susceptible to the histogram  
 293 matching attack. For instance, the KID score of Swin-Transformer is improved by 5.31% when the  
 294 chosen set is used. These observations agree with our findings in our main paper, suggesting that  
 295 certain extractors can be hacked when KID is employed as the distributional distance. Then, we  
 296 investigate the sample efficiency of KID, Precision, and Recall to probe the impacts of the amount  
 297 of generated samples. Fig. 5 presents the curves of KID, Precision, and Recall scores computed  
 298 under different data regimes. Similarly, we could observe that the KID scores can be improved by  
 299 synthesizing more images. Interestingly, the recall scores decrease as the generated sample size  
 300 increases whereas the precision is stable. This is caused by the definition of recall: recall measures  
 301 the proportion of the real distribution that is covered by the synthesized distribution. In practical  
 302 computation, the denominator increases as the synthesized samples increases, while the numerator  
 303 (*i.e.*, images from the real distribution) remain unchanged. In this way, the recall scores decrease  
 304 as the generated sample size increases and vice versa. By contrast, CKA scores are stable under  
 305 different data regimes, (please see Fig. 2 in the main paper). Moreover, CKA can provide reliable  
 306 synthesis evaluation that agrees with human visual judgment. Accordingly, CKA is a proper choice  
 307 for building a consistent and reliable measurement system. These results will be added in the next  
 308 version of our paper.

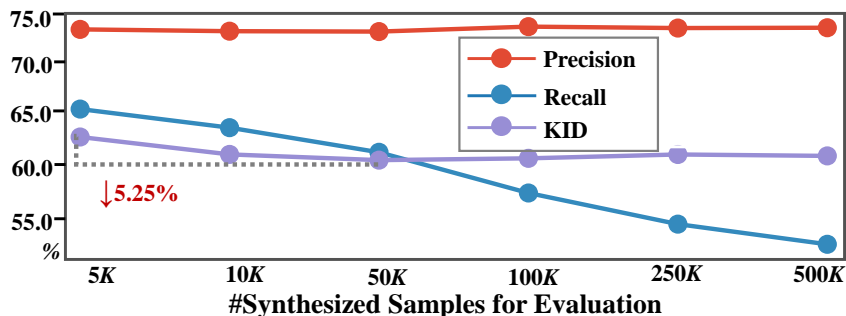

Figure 5: **Kernel Inception Distance (KID), Precision, and Recall scores evaluated under various data regimes on FFHQ dataset.** The scores are scaled for better visualization. ↓ denotes the results fluctuate downward. The percentages represent the magnitude of the numerical variation.

309 **Q4: It will be good if the reviewer can see the dataset during the review process.**

310 **Reply:** Thanks. All evaluated datasets and generative models are publicly available thanks to  
 311 the original authors’ generous release. For synthesized images, we either gather the pre-computed  
 312 datasets from the official repositories or use public models with the official settings to generate new

313 images for evaluation. We will make our code and evaluation scripts publicly available, making it  
 314 easier to evaluate synthesis performance.

315 Hope that the above discussions could address your concerns, please let us know if you have any  
 316 further questions. Thanks for your effort and constructive suggestions again.

317 **To Reviewer xEcW**

318 **Q1: It would be beneficial to have a proposed metric for evaluating the performance of image  
 319 translation.**

320 **Reply:** Thanks. Following your valuable suggestion, we employ our measurement system to  
 321 evaluate the performance of image-to-image translation. We collect publicly available image-to-  
 322 image translation models that are officially released to translate images from one domain to another  
 323 domain for evaluation. Specifically, three translation benchmarks are involved here, namely Horse-to-  
 324 Zebra [19, 23, 13], Cat-to-Dog [21, 13], and Dog-to-Cat [21, 6]. For each benchmark, we translate  
 325 the tested images to the target domain following the original experimental settings. Then we compute  
 326 the distributional discrepancies between the translated images and the real target images. Tab. 7,  
 327 8, and Tab. 9 respectively present the quantitative results of the evaluated three image-to-image  
 328 translation benchmarks. It can be seen from these results that CKA provides consistent ranks with  
 329 FID among various extractors, and the averaged score can reflect the performance of different image  
 330 translation models. For instance, the performance of CUT [13] on Horse-to-Zebra is identified better  
 331 than that of CycleGAN [23] by both FID and our proposed metric. And the qualitative results in the  
 332 original paper of CUT [13] also suggest that the performance of CUT surpasses CycleGAN. That is,  
 333 our measurement system can provide a reliable evaluation under such settings. This indicates that  
 334 our measurement system can also be used for evaluating the performance of image translation tasks.  
 335 These results will be added in the next version of our paper, and we plan involve more state-of-the-art  
 336 image translation models for evaluation for future work.

Table 7: **Quantitative comparison results of Centered Kernel Alignment (CKA<sub>↑</sub>) on Horse-to-Zebra dataset.**

| Model             | FID   | ConvNeXt | RepVGG | SWAV  | ViT   | MoCo-ViT | CLIP-ViT | Overall |
|-------------------|-------|----------|--------|-------|-------|----------|----------|---------|
| CycleGAN [23]     | 83.32 | 73.55    | 88.67  | 85.82 | 83.96 | 74.72    | 73.74    | 80.08   |
| AttentionGAN [19] | 76.05 | 75.59    | 91.73  | 86.37 | 85.16 | 76.65    | 75.49    | 81.83   |
| CUT [13]          | 51.29 | 78.48    | 93.22  | 88.83 | 87.84 | 78.75    | 77.36    | 84.08   |

Table 8: **Quantitative comparison results of Centered Kernel Alignment (CKA<sub>↑</sub>) on Cat-to-Dog dataset.**

| Model        | FID   | ConvNeXt | RepVGG | SWAV  | ViT   | MoCo-ViT | CLIP-ViT | Overall |
|--------------|-------|----------|--------|-------|-------|----------|----------|---------|
| CUT [13]     | 74.95 | 84.93    | 78.75  | 88.83 | 84.31 | 93.56    | 70.91    | 83.55   |
| GP-UNIT [21] | 60.96 | 90.45    | 87.79  | 94.05 | 90.12 | 95.91    | 75.32    | 88.94   |

Table 9: **Quantitative comparison results of Centered Kernel Alignment (CKA<sub>↑</sub>) on Dog-to-Cat dataset.**

| Model        | FID   | ConvNeXt | RepVGG | SWAV  | ViT   | MoCo-ViT | CLIP-ViT | Overall |
|--------------|-------|----------|--------|-------|-------|----------|----------|---------|
| GP-UNIT [21] | 31.66 | 79.58    | 78.18  | 96.79 | 86.93 | 93.92    | 77.42    | 85.47   |
| MUNIT [6]    | 18.88 | 84.87    | 84.11  | 98.51 | 88.11 | 95.95    | 86.10    | 89.61   |

337 **Q2: Although a large amount of experiments has been conducted, this work seems to simply  
 338 exploited existing findings such as advantages of CNN-transformer networks.**

339 **Reply:** Thanks. In this work, we seek to develop a new measurement system that could provide  
 340 reliable and consistent synthesis comparisons. In particular, two key components are crucial  
 341 for the measurement system, *i.e.*, the feature extractor that defines representation space and the  
 342 distributional distance that deliver similarities. Accordingly, we make in-depth analyses on the  
 343 reliability and robustness of various feature extractors and different distributional distances. For the  
 344 feature extractors, we gather multiple models that are pre-trained with different objectives (fully-  
 345 supervised/self-supervised) and various architectures (CNN/ViT/MLP). Notably, these models are

346 chosen for a systematic investigation to comprehensively understand the intrinsic properties of various  
347 extractors, rather than based on existing findings. Then, we testify their performance on 1) how many  
348 semantic features they can capture for evaluation, 2) how robust they are when being attacked by the  
349 histogram matching mechanism, and 3) how distinct the representation space they can define. These  
350 investigations provide several new findings to the community, including 1) one specific extractor  
351 can only capture limited semantics and provide one-side results, 2) extractors that are vulnerable  
352 to the histogram matching attack are not reliable, and 3) different feature extractors might define  
353 similar representation spaces. For the distributional distances, we investigate the numerical stability  
354 of different distances across various representation spaces and the sample efficiency of different  
355 distances. Through extensive comparisons, we find that Centered Kernel Alignment (CKA) provides a  
356 better comparison across various extractors and hierarchical layers with its bounded score. Moreover,  
357 CKA is more sample-efficient and exhibits better agreement with human visual judgment. Together  
358 with these findings, we build a new measurement system that can accurately reflect the synthesis  
359 performance. To the best of our knowledge, this paper is the first work to present these findings in the  
360 community of generative models. We believe that these findings can provide potential insights to  
361 further works that develop new evaluation protocols.

362 **Q3: In addition to quality, this study should extend the metric to assess the diversity and novelty**  
363 **of generated samples.**

364 **Reply:** Thanks. The target of generative models is to reproduce the observed data distribution,  
365 thus a good metric should accurately deliver the distributional discrepancy between the synthesized  
366 distribution and the real distribution to reflect the synthesis performance. Accordingly, our proposed  
367 evaluation system focuses on capturing the similarity between different data distributions instead of  
368 one certain aspect of the synthesized images, *e.g.*, quality and fidelity. By comparing the distributional  
369 distances between the original distribution and the synthesized distribution produced by various  
370 generative models, we can capture their actual improvement. We agree that assessing the diversity  
371 and novelty of generated samples is crucial to understand the intrinsic properties of the synthesized  
372 distributions, but this is slightly out of scope in this paper. We plan to investigate the performance  
373 of our evaluation system in assessing the synthesis diversity and novelty in our future studies as  
374 suggested.

375 Hope that the above discussions could address your concerns, please let us know if you have any  
376 further questions. Thanks for your effort and constructive suggestions again.

## 377 References

- 378 [1] M. Bińkowski, D. J. Sutherland, M. Arbel, and A. Gretton. Demystifying MMD GANs. In *Int. Conf.*  
379 *Learn. Represent.*, 2018.
- 380 [2] N. Cristianini, J. Shawe-Taylor, A. Elisseeff, and J. Kandola. On kernel-target alignment. *Adv. Neural*  
381 *Inform. Process. Syst.*, 2001.
- 382 [3] M. Davari, S. Horoi, A. Natick, G. Lajoie, G. Wolf, and E. Belilovsky. Reliability of cka as a similarity  
383 measure in deep learning. *arXiv preprint arXiv:2210.16156*, 2022.
- 384 [4] S. Gao, P. Zhou, M.-M. Cheng, and S. Yan. Masked diffusion transformer is a strong image synthesizer.  
385 *Int. Conf. Comput. Vis.*, 2023.
- 386 [5] A. Gretton, O. Bousquet, A. Smola, and B. Schölkopf. Measuring statistical dependence with hilbert-  
387 schmidt norms. In *International conference on algorithmic learning theory*, pages 63–77, 2005.
- 388 [6] X. Huang, M.-Y. Liu, S. Belongie, and J. Kautz. Multimodal unsupervised image-to-image translation. In  
389 *Eur. Conf. Comput. Vis.*, pages 172–189, 2018.
- 390 [7] M. Kang, J.-Y. Zhu, R. Zhang, J. Park, E. Shechtman, S. Paris, and T. Park. Scaling up gans for text-to-  
391 image synthesis. In *IEEE Conf. Comput. Vis. Pattern Recog.*, pages 10124–10134, 2023.
- 392 [8] D. Kim, Y. Kim, W. Kang, and I.-C. Moon. Refining generative process with discriminator guidance in  
393 score-based diffusion models. *Int. Conf. Mach. Learn.*, 2023.
- 394 [9] S. Kornblith, M. Norouzi, H. Lee, and G. Hinton. Similarity of neural network representations revisited. In  
395 *Int. Conf. Mach. Learn.*, pages 3519–3529, 2019.

- 396 [10] N. Kumari, R. Zhang, E. Shechtman, and J.-Y. Zhu. Ensembling off-the-shelf models for gan training. In  
397 *IEEE Conf. Comput. Vis. Pattern Recog.*, pages 10651–10662, 2022.
- 398 [11] T. Kynkäänniemi, T. Karras, M. Aittala, T. Aila, and J. Lehtinen. The role of imagenet classes in fr\`echet  
399 inception distance. In *arXiv preprint arXiv:2203.06026*, 2022.
- 400 [12] H. Liu, Z. Dai, D. So, and Q. V. Le. Pay attention to mlps. *Adv. Neural Inform. Process. Syst.*, 34:  
401 9204–9215, 2021.
- 402 [13] T. Park, A. A. Efros, R. Zhang, and J.-Y. Zhu. Contrastive learning for unpaired image-to-image translation.  
403 In *Eur. Conf. Comput. Vis.*, pages 319–345, 2020.
- 404 [14] S. Qian, H. Chang, Y. Li, Z. Zhang, J. Jia, and H. Zhang. Strait: Non-autoregressive generation with  
405 stratified image transformer. *arXiv preprint arXiv:2303.00750*, 2023.
- 406 [15] M. S. Sajjadi, O. Bachem, M. Lucic, O. Bousquet, and S. Gelly. Assessing generative models via precision  
407 and recall. *Adv. Neural Inform. Process. Syst.*, 31, 2018.
- 408 [16] A. Sauer, K. Chitta, J. Müller, and A. Geiger. Projected gans converge faster. *Adv. Neural Inform. Process.  
409 Syst.*, pages 17480–17492, 2021.
- 410 [17] D. Sejdinovic, B. Sriperumbudur, A. Gretton, and K. Fukumizu. Equivalence of distance-based and  
411 rkhs-based statistics in hypothesis testing. *The annals of statistics*, pages 2263–2291, 2013.
- 412 [18] T. R. Shaham, T. Dekel, and T. Michaeli. Singan: Learning a generative model from a single natural image.  
413 In *Int. Conf. Comput. Vis.*, pages 4570–4580, 2019.
- 414 [19] H. Tang, H. Liu, D. Xu, P. H. Torr, and N. Sebe. Attentiongan: Unpaired image-to-image translation using  
415 attention-guided generative adversarial networks. *IEEE Trans. Neural Networks Learn. Syst.*, 2021.
- 416 [20] I. O. Tolstikhin, N. Houlsby, A. Kolesnikov, L. Beyer, X. Zhai, T. Unterthiner, J. Yung, A. Steiner,  
417 D. Keysers, J. Uszkoreit, et al. Mlp-mixer: An all-mlp architecture for vision. *Adv. Neural Inform. Process.  
418 Syst.*, 34:24261–24272, 2021.
- 419 [21] S. Yang, L. Jiang, Z. Liu, and C. C. Loy. Unsupervised image-to-image translation with generative prior.  
420 In *IEEE Conf. Comput. Vis. Pattern Recog.*, pages 18332–18341, 2022.
- 421 [22] R. Zhang, P. Isola, A. A. Efros, E. Shechtman, and O. Wang. The unreasonable effectiveness of deep  
422 features as a perceptual metric. In *IEEE Conf. Comput. Vis. Pattern Recog.*, pages 586–595, 2018.
- 423 [23] J.-Y. Zhu, T. Park, P. Isola, and A. A. Efros. Unpaired image-to-image translation using cycle-consistent  
424 adversarial networks. In *Int. Conf. Comput. Vis.*, pages 2223–2232, 2017.

---

# Revisiting the Evaluation of Image Synthesis with GANs — *Supplementary Material*

---

Anonymous Author(s)

Affiliation

Address

email

1 This *Supplementary Material* is organized as follows: appendix **A** discusses the limitations of  
2 our paper and appendix **B** provides the implementation details of our experiments, appendix **C**  
3 demonstrates how human visual judgment is performed, and appendix **D** presents more quantitative  
4 and qualitative results.

## 5 **A Limitations**

6 Despite a comprehensive investigation, our study could still be extended in several aspects. For  
7 instance, the impacts of different low-level image processing techniques (*e.g.*, resizing) could be  
8 identified since they also play an important role in synthesis evaluation [11]. Besides, comparing  
9 datasets with various resolutions could be further studied. Nonetheless, our study could be considered  
10 an empirical revisiting towards the paradigm of evaluating generative models. We hope this work  
11 could inspire more fascinating works of synthesis evaluation and provide potential insight to develop  
12 more comprehensive evaluation protocols. We will also conduct more investigation on the unexplored  
13 factors and compare more generative models with our system.

## 14 **B Implementation Details**

### 15 **B.1 Datasets**

16 **FFHQ** [14] contains unique 70,000 human-face images with large variations in terms of age, ethnicity,  
17 and facial expressions. We employ the resolution of  $256 \times 256 \times 3$  for our experiments.

18 **ImageNet** [4] includes 1,280,000 images with 1,000 classes of different objects such as goldfish,  
19 bow tie, etc. All experiments on ImageNet are performed with the resolution of  $256 \times 256 \times 3$  unless  
20 otherwise specified.

21 **LSUN Church** [17] consists of 126,227 images of the church, varies in the background, perspectives,  
22 etc. We employ the resolution of  $256 \times 256 \times 3$  for our experiments.

### 23 **B.2 Experimental Settings and Hyperparameters**

**Kernel selection.** We consistently employ the RBF kernel

$$K(\mathbf{x}_i, \mathbf{x}_j) = \exp\left(-\frac{\|\mathbf{x}_i - \mathbf{x}_j\|^2}{2\sigma^2}\right)$$

24 for calculating the CKA. The bandwidth  $\sigma$  is set as a fraction of the median distance between  
25 examples. In practice, three commonly used kernels could be employed for calculation, namely  
26 linear, polynomial, and RBF kernels. In order to investigate their difference, three publicly available

Table 1: **CKA results with different kernels.** The publicly available models are gathered for comparison. <sup>†</sup> results are quoted from the original paper.

| Kernel           | InsGen-2k | InsGen-10k | InsGen-140k |
|------------------|-----------|------------|-------------|
| FID <sup>†</sup> | 11.92     | 4.90       | 3.31        |
| Linear           | 99.83     | 99.93      | 99.98       |
| Poly             | 99.58     | 99.87      | 99.92       |
| RBF              | 95.72     | 98.65      | 99.10       |

Table 2: **CKA results with different features for calculation.**

| Metrics        | InsGen-2k | InsGen-10k | InsGen-140k |
|----------------|-----------|------------|-------------|
| Local Features | 96.62     | 97.42      | 97.38       |
| Global Token   | 97.46     | 97.88      | 97.93       |

27 models with clear performance margins are collected for evaluation. Concretely, we gather models of  
 28 InsGen [16] trained on FFHQ with different data regimes (*i.e.*, 2K, 10K, 140K), the ranking of their  
 29 synthesis quality is clear and reasonable.

30 Tab. 1 demonstrates the quantitative results of CKA with different kernels. Obviously, these kernels  
 31 give similar results and rankings. However, the RBF kernel contributes to the distinguishability of  
 32 quantitative results, making the results more comparable. Consequently, the RBF kernel is employed  
 33 in our experiments.

34 **ViT features calculation.** The feature maps of ViT-based extractors are three-dimensional tensors  
 35 (N, W, C), where W contains the global token and local features. The global token captures the same  
 36 semantic information as the local features. Thus the global token features are used for computation in  
 37 implementation. Tab. 2 shows the comparison results of using local features and the global token.  
 38 Consistently, they give similar results and rankings, so we use the global token for calculation in our  
 39 experiments.

40 **Feature normalization.** In practice, the activations of features play an essential role in computing the  
 41 similarity index. Namely, the quantitative results would be dominated by a few activations with large  
 42 peaks, neglecting other correlation patterns [15]. To investigate the activations of our self-supervised  
 43 extractors, we visualize the activations of different samples and their statistics.

44 Fig. 1 and Fig. 2 respectively illustrate the activation of different samples and their statistics.  
 45 Obviously, there are several peaks in the activations. And these peaks may dominate the similarity  
 46 index as they are substantially larger than other activations. To mitigate the peaks and create a more  
 47 uniform distribution, we employ the softmax transformation [15] to normalize the features. Such  
 48 operation smooths the activations while maintaining the original distributional information of features.  
 49 Thus the similarity index remains consistent to deliver the distribution discrepancy. Besides the  
 50 softmax transformation, we also compare the behavior of different normalization techniques (*i.e.*,  $L_1$   
 51 and  $L_2$  normalization).

52 Tab. 3 demonstrate the quantitative results with different normalization techniques. They consistently  
 53 provide similar results and rankings, and the softmax transformation ameliorates the peaks more  
 54 significantly, providing more comparable results. Consequently, we adopt Softmax normalization in  
 55 our experiments.

56 **Histogram matching.** In order to investigate the robustness of the measurement system, we  
 57 employ the histogram matching [8] to attack the system. To be specific, a subset with a considerable  
 58 number (*e.g.*, 50K) of images is chosen as the referenced distribution, and the corresponding class  
 59 distribution is predicted by a given classifier (*i.e.*, Inception-V3 [13]). With the guidance of the  
 60 classifier, the generator is encouraged to produce a synthesis distribution that matches the predicted  
 61 class distribution of real images. Recall that the generator used to produce these synthesized  
 62 distributions stays unchanged, thus a robust measurement system should give consistent similarities  
 63 between the randomly generated and the matched distribution.

Table 3: CKA scores with different normalization techniques.

| Metrics         | InsGen-2k | InsGen-10k | InsGen-140k |
|-----------------|-----------|------------|-------------|
| $CKA_{No}$      | 97.46     | 97.88      | 97.93       |
| $CKA_{L1}$      | 96.62     | 98.91      | 99.33       |
| $CKA_{L2}$      | 96.62     | 98.91      | 99.32       |
| $CKA_{Softmax}$ | 95.72     | 98.65      | 99.10       |

64 Fig. 3 provides the class distribution of real and synthesized FFHQ images predicted by Inception-V3.  
 65 Obviously, the class distribution of the matched distribution is well-aligned with the predicted real  
 66 distribution.

67 **Sample-efficiency.** In order to investigate the impacts of the number of synthesized samples, we  
 68 compute the distributional distances between the real distribution with synthesized distributions with  
 69 various numbers of generated images. Concretely, FFHQ (with 70K images) and ImageNet (with  
 70 1.28 million images) are investigated for universal conclusions. For both datasets, we synthesis 500K  
 71 images as candidate, and randomly choose 5K, 10K, 50K, 100K, 250K, and 500K images as the  
 72 synthesized distribution for computing the metrics. The entire training data is utilized as the real  
 73 distribution, and the publicly accessible models on FFHQ<sup>1</sup> and ImageNet<sup>2</sup> are employed.

74 **The curve of FD and CKA under various data regimes on ImageNet dataset** is shown in Fig. 4.  
 75 Consistent with the aforementioned results in the main paper, CKA could measure the distributional  
 76 distances precisely with only 5K samples, whereas FID fails to deliver the actual measurement  
 77 until sufficient samples are used. That is, CKA could give reliable results even when limited data is  
 78 given, suggesting impressive sample efficiency. Equipped with the bounded quantitative results and  
 79 consistency under different data regimes, as well as the robustness to the histogram matching attack,  
 80 CKA outperforms FID as a reliable distance for delivering the distributional discrepancy.

## 81 C User Preference Study

82 Here we present more details about our human perceptual judgment. Recall that two strategies are  
 83 designed for different investigations, namely benchmarking the synthesis quality of one specific  
 84 generative model and comparing two paired generative models. Fig. 5 shows the user interface for  
 85 benchmarking the synthesis quality of one specific generative model (*i.e.*, BigGAN on ImageNet  
 86 here). To be more specific, considerable randomly generated images are shown to the user, and the  
 87 user is required to determine the fidelity of synthesized images. We then obtain the final scores by  
 88 averaging the judgments of the participants (*i.e.*, 100 individuals).

89 Fig. 6 and Fig. 7 show the human evaluation results on FFHQ and ImageNet dataset, respectively.  
 90 The percentages denote how many samples of the selected images are considered photo-realistic.  
 91 Together with the quantitative results in our main paper, we could tell that the proposed metric shows  
 92 a better correlation with human visual comparison.

93 Recall that in our main paper, we find that our evaluation system gives the opposite ranking to the  
 94 existing metric (*i.e.*, FID) in some circumstances. For instance, the synthesis quality of ICGAN  
 95 is determined basically the same as that of the class-conditional ICGAN (C-ICGAN) under our  
 96 evaluation, whereas the FID votes C-ICGAN for the much better one. We thus conduct the other user  
 97 study to compare two paired generative models. Concretely, we prepare groups of paired images of  
 98 different generative models and ask 100 individuals to assess which model could produce high-quality  
 99 images. The same groups are repeated several times by changing the order of images, ensuring the  
 100 human evaluation is reliable and consistent.

101 Fig. 8 provides the interface of comparing two paired generative models, users are asked to choose  
 102 which set of images looks more plausible. Additionally, Fig. 9 shows the pipeline of analyzing the

<sup>1</sup><https://github.com/NVLabs/stylegan3>

<sup>2</sup><https://github.com/autonomousvision/stylegan-xl>

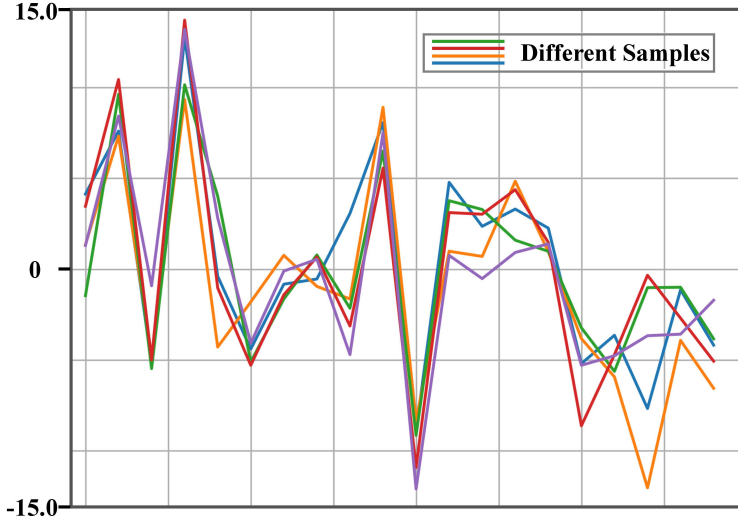

Figure 1: **Visualization of different samples' activations.** The large peaks may dominate the similarity index as their numerical values substantially surpass smaller values.

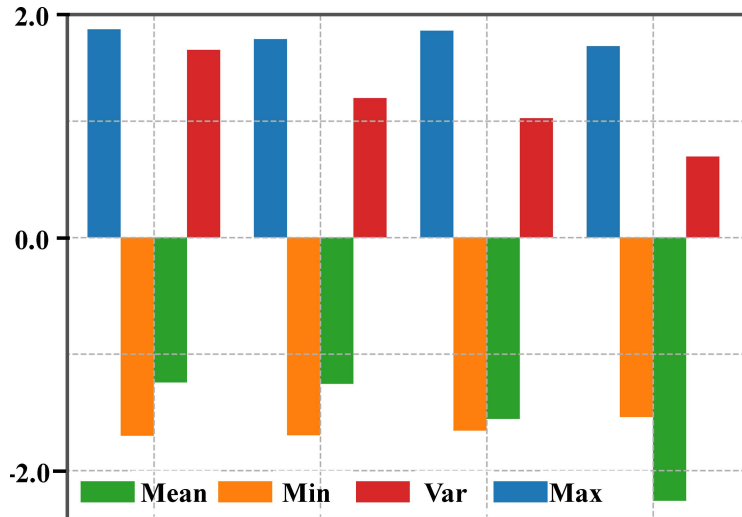

Figure 2: **Statistics of different samples' activations.** There are clear margins between different statistics (*e.g.*, Max and Min) of each sample, suggesting that the activation distribution is very peaky.

103 paired comparison results. Specifically, the same groups of images are repeated for 4 times in random  
 104 order and users are shown 16 images from two models to determine the more photorealistic one. In  
 105 this way, the results of choosing both Projected-GAN and StyleGAN2 two times are identified as  
 106 indistinguishable for enduring the consistency. Namely, the users choose different rankings between  
 107 the two sets when the order of images is changed, which does not meet the consistency. Consequently,  
 108 the final scores for paired comparison are obtained by quantifying the percentage of the human  
 109 preferences that correlate the consistency.

## 110 **D More Quantitative and Qualitative Results**

111 In this section, we further provide more results of different semantic levels from various extractors  
 112 and the curve of different distances evaluated on various data regimes.

113 **Similarities between various representation spaces.** Recall that we filtered out extractors that  
 114 define similar representation spaces to avoid redundancy in the main paper. The correlation between  
 115 representations of high dimension in different feature extractors is calculated following [7]. In  
 116 particular, a considerable number of images (*i.e.*, 10K images from ImageNet) are fed into these



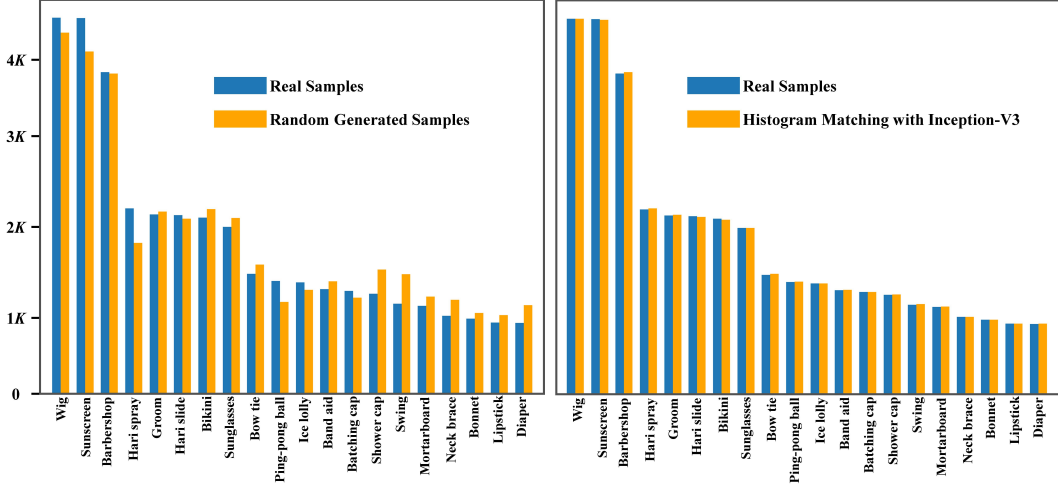

Figure 3: **The class distribution of randomly generated images (left) and histogram matched images (right), predicted by the fully-supervised Inception-V3 [13].**

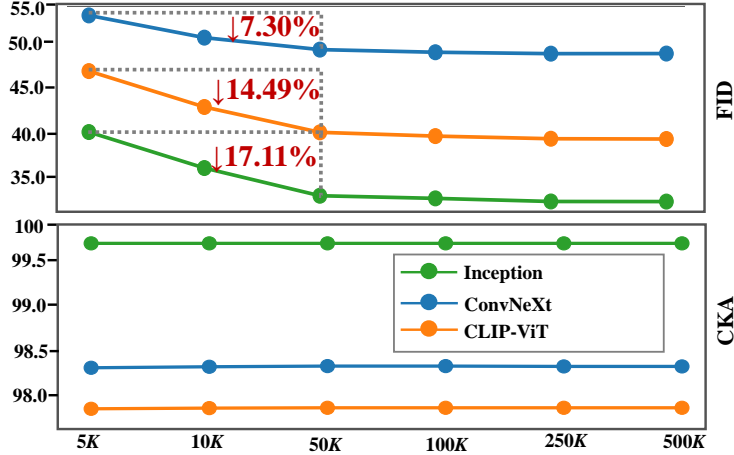

Figure 4: **Fréchet Distance (FD) and Centered Kernel Alignment (CKA) scores evaluated under various data regimes on ImageNet dataset.** FID scores are scaled for better visualization. ↓ denotes the results fluctuate downward. The percentages represent the magnitude of the numerical variation.

117 extractors for computing their correspondence. Fig. 10 shows the similarity of their representations.  
 118 Obviously, the representations of CLIP-ResNet and MoCo-ResNet have higher similarity with  
 119 other extractors. Considering these two extractors are both CNN-based and they capture similar  
 120 semantics with other CNN-based extractors, we remove the CLIP-ResNet and MoCo-ResNet to avoid  
 121 redundancy. Accordingly, we obtain a set of feature extractors that 1) capture rich semantics in a  
 122 complementary way, 2) are robust toward the histogram matching attack, and 3) define meaningful  
 123 and distinctive representation spaces for synthesis comparison. The following table presents these  
 feature extractors. These extractors, including both CNN-based and ViT-based architectures,

|                  |                                      |
|------------------|--------------------------------------|
| <b>CNN-based</b> | ConvNeXt [9], SWAV [2], RepVGG [5]   |
| <b>ViT-based</b> | CLIP-ViT [12], MoCo-ViT [3], ViT [6] |

124 have demonstrated strong performance in pre-defined and downstream tasks, facilitating more  
 125 comprehensive and reliable evaluation. Notably, the inclusion of self-supervised extractors SWAV,  
 126 CLIP-V, and MoCo-V aligns with previous findings [10, 8, 1]. This selection of feature extractors  
 127 provides a diverse and complementary set of representations, enabling a more comprehensive and  
 128 reliable evaluation of synthesis quality in generative models.  
 129

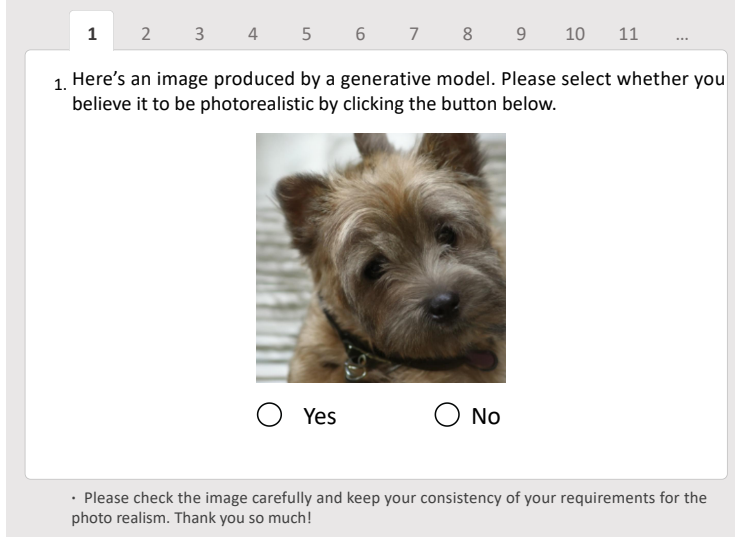

Figure 5: User interface for benchmarking the synthesis quality.

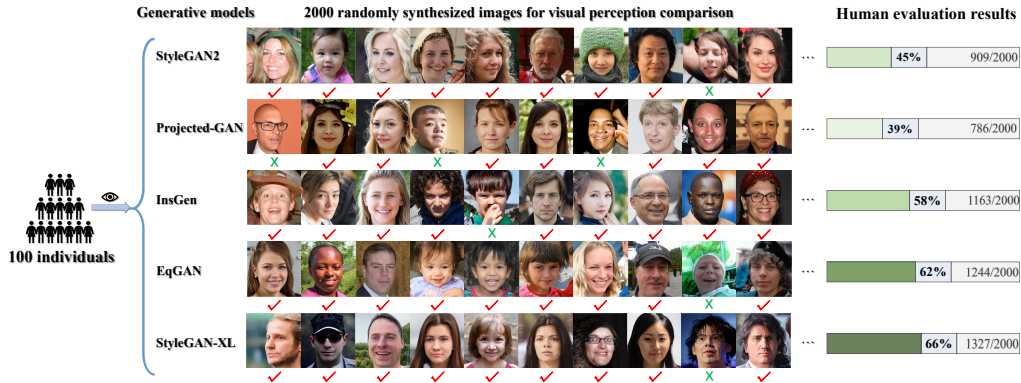

Figure 6: Human judgment results of various generative models on FFHQ. 2K images randomly generated by different models are selected for comparison.

130 **More results of hierarchical levels from various extractors.** Tab. 4, Tab. 5, Tab. 6, Tab. 7,  
 131 and Tab. 8 respectively present the heatmaps and quantitative results of various semantic levels. We  
 132 could tell that despite the Fréchet Distance (FD) scores consistently reflect synthesis quality, their  
 133 numerical values fluctuate dramatically. On the contrary, CKA provides normalized distances *w.r.t*  
 134 the numerical scale across various levels. Also, the heatmaps from various semantic levels reveal that  
 135 hierarchical features encode different semantics. Such observation provides interesting insights that  
 136 feature hierarchy should be also considered for synthesis comparison. Notably, benefiting from the  
 137 bounded quantitative results, CKA demonstrates great potentials for comparison across hierarchical  
 138 layers.

Table 4: Heatmaps from various semantic levels on FFHQ dataset (*left*) and quantitative results of Fréchet Distance (FD ↓) and Centered Kernel Alignment (CKA ↑) on ImageNet dataset (*right*). ConvNext [9] serves as the feature extractor for hierarchical evaluation here.

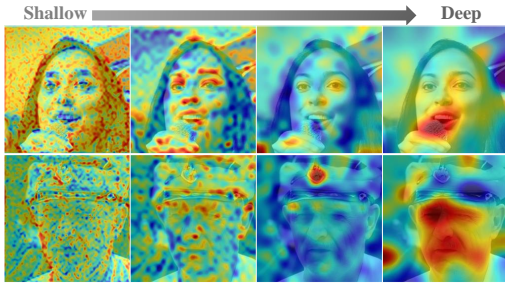

| Model              | BigGAN          |                  | BigGAN-deep     |                  | StyleGAN-XL     |                  |
|--------------------|-----------------|------------------|-----------------|------------------|-----------------|------------------|
|                    | FD <sub>↓</sub> | CKA <sub>↑</sub> | FD <sub>↓</sub> | CKA <sub>↑</sub> | FD <sub>↓</sub> | CKA <sub>↑</sub> |
| Layer <sub>1</sub> | 2.64            | 96.08            | 2.56            | 96.35            | 0.58            | 98.24            |
| Layer <sub>2</sub> | 40.20           | -                | 32.32           | -                | 11.84           | -                |
| Layer <sub>3</sub> | 687.40          | 58.76            | 364.95          | 60.25            | 264.87          | 62.53            |
| Layer <sub>4</sub> | 140.04          | 68.86            | 102.26          | 69.27            | 19.22           | 70.52            |
| Overall            | N/A             | 74.57            | N/A             | 75.29            | N/A             | 77.10            |

Table 5: Heatmaps from various semantic levels on FFHQ dataset (*left*) and quantitative results of Fréchet Distance (FD ↓) and Centered Kernel Alignment (CKA ↑) on ImageNet dataset (*right*). RepVGG [5] serves as the feature extractor for hierarchical evaluation here.

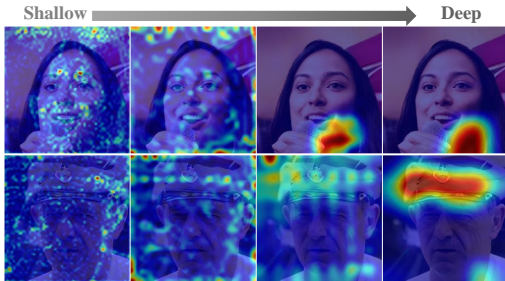

| Model              | BigGAN          |                  | BigGAN-deep     |                  | StyleGAN-XL     |                  |
|--------------------|-----------------|------------------|-----------------|------------------|-----------------|------------------|
|                    | FD <sub>↓</sub> | CKA <sub>↑</sub> | FD <sub>↓</sub> | CKA <sub>↑</sub> | FD <sub>↓</sub> | CKA <sub>↑</sub> |
| Layer <sub>1</sub> | 0.35            | 96.92            | 0.32            | 97.51            | 0.04            | 98.79            |
| Layer <sub>2</sub> | 0.35            | 96.19            | 0.33            | 96.32            | 0.03            | 98.32            |
| Layer <sub>3</sub> | 0.23            | 90.05            | 0.18            | 91.15            | 0.04            | 93.51            |
| Layer <sub>4</sub> | 67.53           | 74.40            | 58.85           | 76.68            | 15.93           | 80.28            |
| Overall            | N/A             | 89.39            | N/A             | 90.42            | N/A             | 92.73            |

Table 6: Heatmaps from various semantic levels on FFHQ dataset (*left*) and quantitative results of Fréchet Distance (FD ↓) and Centered Kernel Alignment (CKA ↑) on ImageNet dataset (*right*). SWAV [2] serves as the feature extractor for hierarchical evaluation here.

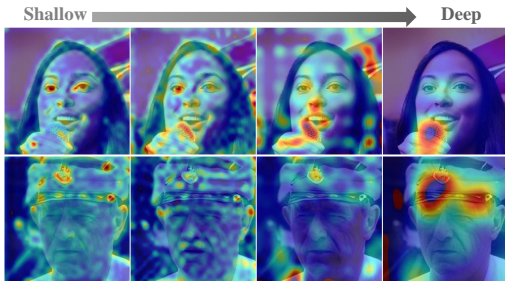

| Model              | BigGAN          |                  | BigGAN-deep     |                  | StyleGAN-XL     |                  |
|--------------------|-----------------|------------------|-----------------|------------------|-----------------|------------------|
|                    | FD <sub>↓</sub> | CKA <sub>↑</sub> | FD <sub>↓</sub> | CKA <sub>↑</sub> | FD <sub>↓</sub> | CKA <sub>↑</sub> |
| Layer <sub>1</sub> | 0.67            | 99.90            | 0.46            | 99.91            | 0.07            | 99.99            |
| Layer <sub>2</sub> | 0.87            | 97.89            | 0.60            | 98.87            | 0.31            | 99.51            |
| Layer <sub>3</sub> | 16.15           | 95.60            | 12.02           | 96.21            | 1.90            | 98.15            |
| Layer <sub>4</sub> | 11.18           | 86.10            | 8.69            | 87.71            | 1.85            | 92.54            |
| Overall            | N/A             | 94.87            | N/A             | 95.68            | N/A             | 97.55            |

Table 7: Heatmaps from various semantic levels on FFHQ dataset (*left*) and quantitative results of Fréchet Distance (FD ↓) and Centered Kernel Alignment (CKA ↑) on ImageNet dataset (*right*). ViT [6] serves as the feature extractor for hierarchical evaluation here.

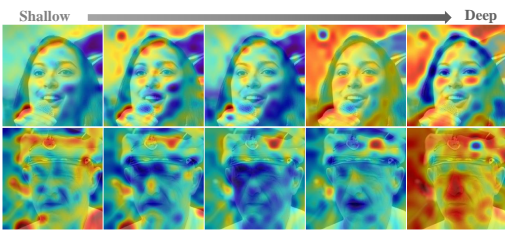

| Model              | BigGAN          |                  | BigGAN-deep     |                  | StyleGAN-XL     |                  |
|--------------------|-----------------|------------------|-----------------|------------------|-----------------|------------------|
|                    | FD <sub>↓</sub> | CKA <sub>↑</sub> | FD <sub>↓</sub> | CKA <sub>↑</sub> | FD <sub>↓</sub> | CKA <sub>↑</sub> |
| Layer <sub>1</sub> | 0.20            | 99.62            | 0.19            | 99.67            | 0.01            | 99.97            |
| Layer <sub>2</sub> | 1.31            | 97.75            | 1.19            | 97.92            | 0.18            | 99.76            |
| Layer <sub>3</sub> | 6.93            | 97.53            | 6.06            | 97.63            | 1.22            | 99.67            |
| Layer <sub>4</sub> | 29.95           | 96.49            | 23.98           | 97.20            | 8.51            | 98.72            |
| Overall            | N/A             | 97.85            | N/A             | 98.11            | N/A             | 99.53            |

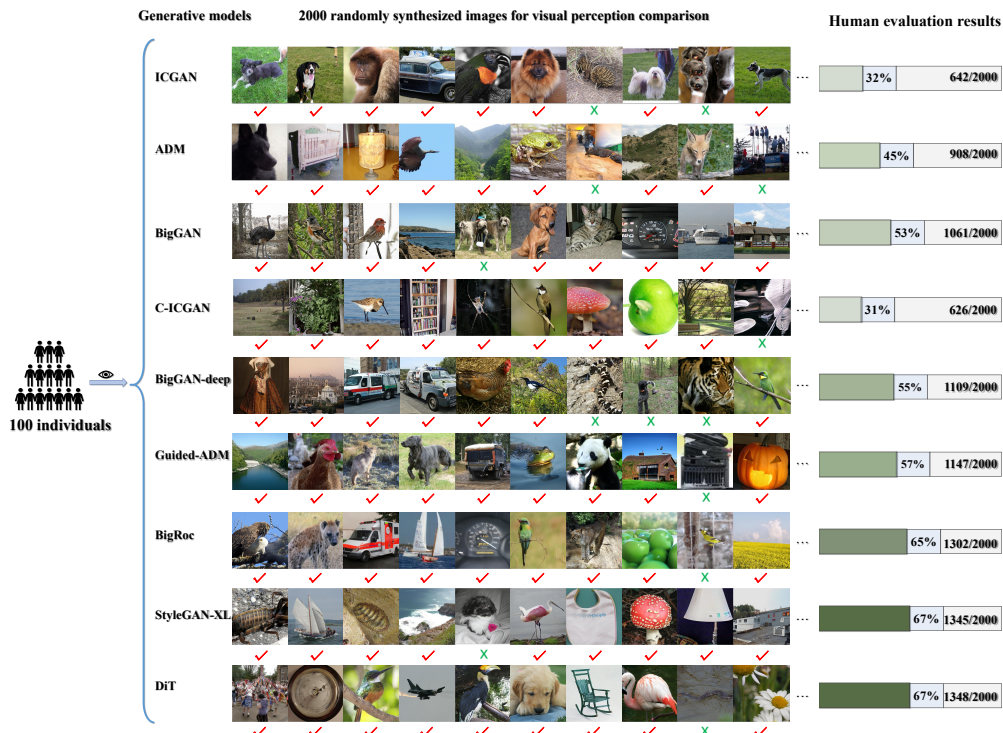

Figure 7: **Human judgment results of various generative models on ImageNet.** 2K images randomly generated by different models are selected for comparison.

Table 8: **Heatmaps from various semantic levels on FFHQ dataset (left) and quantitative results of Fréchet Distance (FD ↓) and Centered Kernel Alignment (CKA ↑) on ImageNet dataset (right).** MoCo-ViT [3] serves as the feature extractor for hierarchical evaluation here.

|                    | Shallow → Deep |       |        |       |             |       |             |      |
|--------------------|----------------|-------|--------|-------|-------------|-------|-------------|------|
|                    | Model          |       | BigGAN |       | BigGAN-deep |       | StyleGAN-XL |      |
| Layer              | FD↓            | CKA↑  | FD↓    | CKA↑  | FD↓         | CKA↑  | FD↓         | CKA↑ |
| Layer <sub>1</sub> | 0.10           | 98.62 | 0.05   | 99.04 | 0.04        | 99.97 |             |      |
| Layer <sub>2</sub> | 1.01           | 97.15 | 0.68   | 97.30 | 0.43        | 99.64 |             |      |
| Layer <sub>3</sub> | 9.18           | 96.07 | 9.01   | 96.77 | 4.30        | 99.11 |             |      |
| Layer <sub>4</sub> | 3.35           | 97.25 | 3.22   | 97.82 | 1.85        | 99.00 |             |      |
| Overall            | N/A            | 97.27 | N/A    | 97.73 | N/A         | 99.43 |             |      |

## 139 References

- 140 [1] E. Betzalel, C. Penso, A. Navon, and E. Fetaya. A study on the evaluation of generative models. *arXiv preprint arXiv:2206.10935*, 2022.
- 142 [2] M. Caron, I. Misra, J. Mairal, P. Goyal, P. Bojanowski, and A. Joulin. Unsupervised learning of visual  
143 features by contrasting cluster assignments. *Adv. Neural Inform. Process. Syst.*, pages 9912–9924, 2020.
- 144 [3] X. Chen, S. Xie, and K. He. An empirical study of training self-supervised vision transformers. In *Int.*  
145 *Conf. Comput. Vis.*, pages 9640–9649, 2021.
- 146 [4] J. Deng, W. Dong, R. Socher, L.-J. Li, K. Li, and L. Fei-Fei. Imagenet: A large-scale hierarchical image  
147 database. In *IEEE Conf. Comput. Vis. Pattern Recog.*, pages 248–255, 2009.
- 148 [5] X. Ding, X. Zhang, N. Ma, J. Han, G. Ding, and J. Sun. Reprvg: Making vgg-style convnets great again.  
149 In *IEEE Conf. Comput. Vis. Pattern Recog.*, pages 13733–13742, 2021.

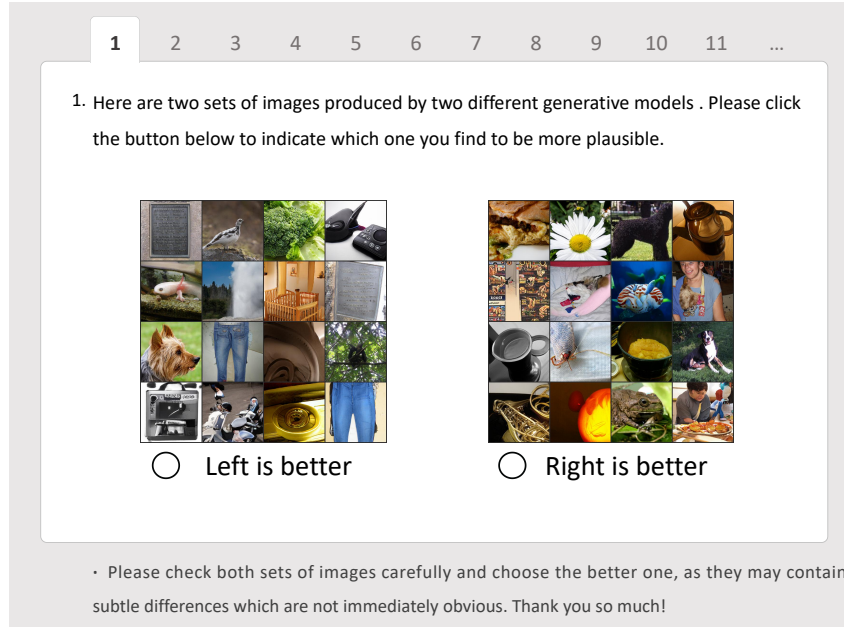

Figure 8: **User interface for comparing the synthesis quality of two paired generative models.** People are asked to determine which set of images look more photorealistic.

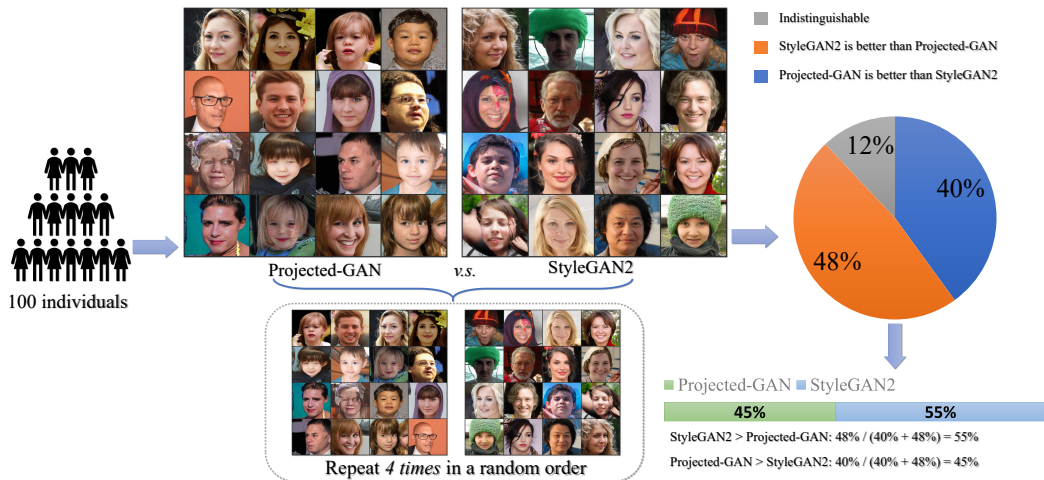

Figure 9: **The pipeline of analyzing the paired comparison results.**

- 150 [6] A. Dosovitskiy, L. Beyer, A. Kolesnikov, D. Weissenborn, X. Zhai, T. Unterthiner, M. Dehghani,  
 151 M. Minderer, G. Heigold, S. Gelly, et al. An image is worth 16x16 words: Transformers for image  
 152 recognition at scale. In *Int. Conf. Learn. Represent.*, 2020.
- 153 [7] S. Kornblith, M. Norouzi, H. Lee, and G. Hinton. Similarity of neural network representations revisited. In  
 154 *Int. Conf. Mach. Learn.*, pages 3519–3529, 2019.
- 155 [8] T. Kynkäänniemi, T. Karras, M. Aittala, T. Aila, and J. Lehtinen. The role of imagenet classes in fr\`echet  
 156 inception distance. In *arXiv preprint arXiv:2203.06026*, 2022.
- 157 [9] Z. Liu, H. Mao, C.-Y. Wu, C. Feichtenhofer, T. Darrell, and S. Xie. A convnet for the 2020s. In *IEEE Conf.*  
 158 *Comput. Vis. Pattern Recog.*, pages 11976–11986, 2022.
- 159 [10] S. Morozov, A. Voynov, and A. Babenko. On self-supervised image representations for gan evaluation. In  
 160 *Int. Conf. Learn. Represent.*, 2021.

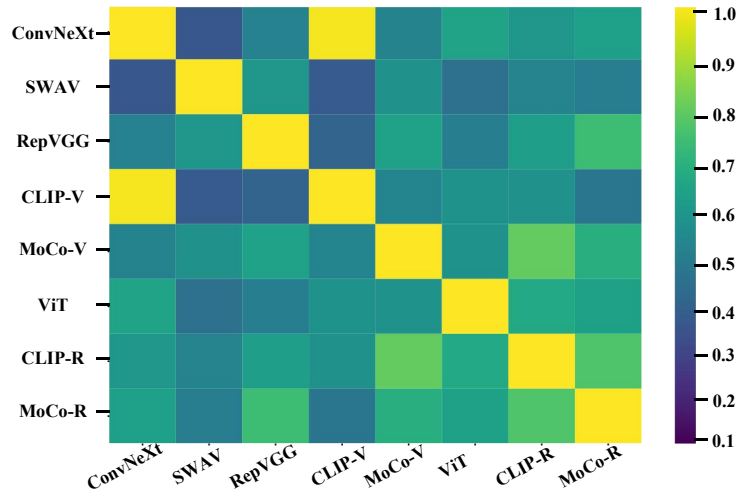

Figure 10: **Representation similarity of various extractors.** Darker Yellow denotes higher similarity.

- 161 [11] G. Parmar, R. Zhang, and J.-Y. Zhu. On aliased resizing and surprising subtleties in gan evaluation. In  
 162 *IEEE Conf. Comput. Vis. Pattern Recog.*, pages 11410–11420, 2022.
- 163 [12] A. Radford, J. W. Kim, C. Hallacy, A. Ramesh, G. Goh, S. Agarwal, G. Sastry, A. Askell, P. Mishkin,  
 164 J. Clark, et al. Learning transferable visual models from natural language supervision. In *Int. Conf. Mach.*  
 165 *Learn.*, pages 8748–8763, 2021.
- 166 [13] C. Szegedy, V. Vanhoucke, S. Ioffe, J. Shlens, and Z. Wojna. Rethinking the inception architecture for  
 167 computer vision. In *IEEE Conf. Comput. Vis. Pattern Recog.*, pages 2818–2826, 2016.
- 168 [14] T. A. Tero Karras, Samuli Laine. Flickr-faces-hq dataset (ffhq). URL [https://github.com/NVLabs/](https://github.com/NVLabs/ffhq-dataset)  
 169 [ffhq-dataset](https://github.com/NVLabs/ffhq-dataset).
- 170 [15] P. Wang, Y. Li, and N. Vasconcelos. Rethinking and improving the robustness of image style transfer. In  
 171 *IEEE Conf. Comput. Vis. Pattern Recog.*, pages 124–133, 2021.
- 172 [16] C. Yang, Y. Shen, Y. Xu, and B. Zhou. Data-efficient instance generation from instance discrimination.  
 173 *Adv. Neural Inform. Process. Syst.*, pages 9378–9390, 2021.
- 174 [17] F. Yu, A. Seff, Y. Zhang, S. Song, T. Funkhouser, and J. Xiao. Lsun: Construction of a large-scale image  
 175 dataset using deep learning with humans in the loop. *arXiv preprint arXiv:1506.03365*, 2015.
